# Supplementary material for: Healthcare resource consumption for intermittent urinary catheterisation: cost-effectiveness of hydrophilic catheters and budget impact analyses
Source: PubMed Central journal article supplement — BMJ Open. 2017 Jan 17;7(1):e012360. doi: 10.1136/bmjopen-2016-012360 (PMC5253566; doi:10.1136/bmjopen-2016-012360), 2017-01-17
Supplement: bmjopen-2016-012360supp_tables.pdf [file bmjopen-2016-012360supp_tables.pdf]

Supplementary Table 1 – Summary of the retrieved utility values for the different health states

| Study               | no UTI                    | UTI                       | Severe UTI                                                                                                            | Bacteraemia               |
|---------------------|---------------------------|---------------------------|-----------------------------------------------------------------------------------------------------------------------|---------------------------|
| Craven 2012 [30]    |                           | 0.28 (SD=0.28)            | 0.15 (SD=0.18)                                                                                                        |                           |
| Lee 2008 [31]       | 0.68-0.70 (SD=0.01)       | 0.58-0.60 (SD=0.01)       |                                                                                                                       |                           |
| Birmingham 2013 [3] | 0.831 (95%CI 0.809-0.852) | 0.782 (95%CI 0.764-0.799) | First-line-resistant UTI<br>0.760 (95%CI 0.685-0.834)<br><br>Multidrug-resistant UTI<br><br>0.738 (95%CI 0.688-0.787) | 0.716 (95%CI 0.645-0.786) |
| Clark 2015 [4]      | 0.468                     | disutility 0.060          | disutility 0.104 (antibiotic resistant)<br><br>disutility 0.160 (UTI not responding to initial treatment)             |                           |

CI=confidence interval, SD=standard deviation

Supplementary Table 2 – Healthcare resource consumption for the considered health states/events

| Health state   | Category                   | Type                                                                              | mean number per patient                                   | dosage (mg) per patient | % patients |
|----------------|----------------------------|-----------------------------------------------------------------------------------|-----------------------------------------------------------|-------------------------|------------|
| Alive (1 year) | Visits                     | Specialist visit                                                                  | 1.99                                                      |                         |            |
|                |                            | Exams/procedures                                                                  | Abdomen ultrasound                                        | 0.11                    |            |
|                | Bladder ultrasound         |                                                                                   | 0.81                                                      |                         |            |
|                | Creatinine                 |                                                                                   | 0.20                                                      |                         |            |
|                | Magnetic resonance imaging |                                                                                   | 0.02                                                      |                         |            |
|                | Pelvic floor examination   |                                                                                   | 0.03                                                      |                         |            |
|                | Cystography                |                                                                                   | 0.06                                                      |                         |            |
|                | Renal scintigraphy         |                                                                                   | 0.01                                                      |                         |            |
|                | Urine culture              |                                                                                   | 3.60                                                      |                         |            |
|                | Urine exam                 |                                                                                   | 2.39                                                      |                         |            |
|                | Urodynamics                |                                                                                   | 0.46                                                      |                         |            |
|                | Video-urodynamics          |                                                                                   | 0.17                                                      |                         |            |
|                | Hospitalisation (DRG)      |                                                                                   | 313 - Urethral Procedures, Age Greater than 17 without CC | 0.01                    |            |
|                |                            | 309 - Minor Bladder Procedures without CC                                         | 0.01                                                      |                         |            |
|                |                            | 323 - Urinary Stones with CC and/or ESW Lithotripsy                               | 0.03                                                      |                         |            |
|                |                            | 324 - Urinary Stones without CC                                                   | 0.02                                                      |                         |            |
|                |                            | 325 - Kidney and Urinary Tract Signs and Symptoms, Age Greater than 17 with CC    | 0.03                                                      |                         |            |
|                |                            | 326 - Kidney and Urinary Tract Signs and Symptoms, Age Greater than 17 without CC | 0.14                                                      |                         |            |
|                |                            | 329 - Urethral Stricture, Age Greater than 17                                     | 0.01                                                      |                         |            |

|                                                                           |                       |                                                                                                                                                                                            |      |        |       |
|---------------------------------------------------------------------------|-----------------------|--------------------------------------------------------------------------------------------------------------------------------------------------------------------------------------------|------|--------|-------|
|                                                                           |                       | without CC                                                                                                                                                                                 |      |        |       |
|                                                                           | Drugs                 | Antimuscarins                                                                                                                                                                              |      | 5,576  | 73%   |
|                                                                           |                       | Botulinum toxin injection                                                                                                                                                                  | 2    |        | 25%   |
|                                                                           |                       | Antibiotics (prophylaxis):<br>sulfamethoxazole+trimethoprim, amoxicillin,<br>levofloxacin, ciprofloxacin                                                                                   |      | 69,127 | 16%   |
| Symptomatic UTI                                                           | Visits                | Specialist visit                                                                                                                                                                           | 0.93 |        |       |
|                                                                           | Exams/procedures      | Creatinine                                                                                                                                                                                 | 0.11 |        |       |
|                                                                           |                       | Bladder ultrasound                                                                                                                                                                         | 0.41 |        |       |
|                                                                           |                       | Blood culture                                                                                                                                                                              | 0.02 |        |       |
|                                                                           |                       | Complete blood count                                                                                                                                                                       | 0.11 |        |       |
|                                                                           |                       | Urine exam                                                                                                                                                                                 | 0.78 |        |       |
|                                                                           |                       | Kidney functionality                                                                                                                                                                       | 0.11 |        |       |
|                                                                           |                       | Urine culture                                                                                                                                                                              | 1.22 |        |       |
|                                                                           | Hospitalisation (DRG) | 321 - Kidney and Urinary Tract Infections, Age<br>Greater than 17 without CC                                                                                                               | 0.52 |        |       |
|                                                                           | Drugs                 | Antibiotics: amikacin, amoxicillin, ampicillin,<br>cefixime, cefpodoxim, ceftriaxone, ciprofloxacin,<br>imipenem, levofloxacin, meropenem,<br>prulifloxacin, sulfamethoxazole+trimethoprim |      | 22,411 | 127%* |
| First-line-resistant UTI<br>(resources in addition<br>to symptomatic UTI) | Visits                | Specialist visit                                                                                                                                                                           | 1.17 |        |       |
|                                                                           | Exams/procedures      | Stool culture                                                                                                                                                                              | 0.01 |        |       |
|                                                                           |                       | Creatinine/glycaemia                                                                                                                                                                       | 0.44 |        |       |
|                                                                           |                       | Abdomen ultrasound                                                                                                                                                                         | 0.11 |        |       |
|                                                                           |                       | Bladder ultrasound                                                                                                                                                                         | 0.37 |        |       |
|                                                                           |                       | Blood culture                                                                                                                                                                              | 0.33 |        |       |
|                                                                           |                       | Urine exam                                                                                                                                                                                 | 1.44 |        |       |
| Video-urodynamics                                                         | 0.11                  |                                                                                                                                                                                            |      |        |       |

|                                                                             |                                                          |                                                                                                                          |       |        |     |
|-----------------------------------------------------------------------------|----------------------------------------------------------|--------------------------------------------------------------------------------------------------------------------------|-------|--------|-----|
|                                                                             |                                                          | Lactate                                                                                                                  | 0.11  |        |     |
|                                                                             |                                                          | Polymerase Chain Reaction                                                                                                | 0.11  |        |     |
|                                                                             |                                                          | Urine culture                                                                                                            | 1.78  |        |     |
|                                                                             |                                                          | Erythrocyte sedimentation rate                                                                                           | 0.11  |        |     |
|                                                                             | Hospitalisation (DRG)                                    | 320 - Kidney and Urinary Tract Infections, Age Greater than 17 with CC                                                   | 0.07  |        |     |
|                                                                             | Drugs                                                    | Antibiotics: amikacin, ceftazidime, ceftriaxone, gentamicin, imipenem, meropenem, minocycline, piperacillin, thienamycin |       | 16,278 | 89% |
| Multidrug-resistant UTI (resources in addition to first-line-resistant UTI) | Visits                                                   | Specialist visit                                                                                                         | 1.2   |        |     |
|                                                                             | Day-hospital                                             | 320 - Kidney and Urinary Tract Infections, Age Greater than 17 with CC                                                   | 0.02  |        |     |
|                                                                             | Exams/procedures                                         | Cystoscopy                                                                                                               | 0.07  |        |     |
|                                                                             |                                                          | Colonoscopy                                                                                                              | 0.11  |        |     |
|                                                                             |                                                          | Bladder ultrasound                                                                                                       | 0.44  |        |     |
|                                                                             |                                                          | Bact smear-lower gastro-intestinal                                                                                       | 0.11  |        |     |
|                                                                             |                                                          | Bowel diagnostic procedure NEC                                                                                           | 0.13  |        |     |
|                                                                             |                                                          | Computerised tomography scan                                                                                             | 0.13  |        |     |
|                                                                             |                                                          | Urine exam                                                                                                               | 1.33  |        |     |
|                                                                             |                                                          | Urine culture                                                                                                            | 1.56  |        |     |
|                                                                             |                                                          | Video-urodynamics                                                                                                        | 0.11  |        |     |
|                                                                             |                                                          | Blood culture                                                                                                            | 0.11  |        |     |
|                                                                             | Intestinal x-ray NEC                                     | 0.11                                                                                                                     |       |        |     |
|                                                                             | Hospitalisation (DRG)                                    | 320 - Kidney and Urinary Tract Infections, Age Greater than 17 with CC                                                   | 0.03  |        |     |
| Drugs                                                                       | Antibiotics: amikacin, imipenem, meropenem, piperacillin |                                                                                                                          | 7,556 | 34%    |     |

|                                    |                       |                                                                                    |       |        |     |
|------------------------------------|-----------------------|------------------------------------------------------------------------------------|-------|--------|-----|
|                                    |                       |                                                                                    |       |        |     |
| Bacteraemia                        | Hospitalisation (DRG) | 576 - Septicaemia without mechanical ventilation                                   | 0.59  |        |     |
|                                    |                       | 320 - Kidney and Urinary Tract Infections, Age Greater than 17 with CC             | 0.03  |        |     |
|                                    | Day-hospital          | 576 - Septicaemia without mechanical ventilation                                   | 0.22  |        |     |
|                                    | Drugs                 | Antibiotics: cefepime, ceftazidime, imipenem, levofloxacin, meropenem, teicoplanin |       | 12,311 | 56% |
| Infection leading to patient death | Hospitalisation (DRG) | 575 - Septicaemia with mechanical ventilation >=96 h                               | 0.45  |        |     |
|                                    | Drugs                 | Antibiotics: amikacin, imipenem, meropenem, vancomycin                             |       | 12,222 | 34% |
| Haematuria                         | Visits                | Specialist visit                                                                   | 0.71  |        |     |
|                                    | Exams/procedures      | Cystoscopy                                                                         | 0.02  |        |     |
|                                    |                       | Bladder ultrasound                                                                 | 0.24  |        |     |
|                                    |                       | Urine exam                                                                         | 0.56  |        |     |
|                                    |                       | Percutaneous cystostomy                                                            | 0.06  |        |     |
|                                    |                       | Urethroscopy                                                                       | 0.21  |        |     |
|                                    |                       | Urine culture                                                                      | 0.22  |        |     |
|                                    | Hospitalisation (DRG) | 309 - Minor Bladder Procedures without CC                                          | 0.002 |        |     |
|                                    |                       | 332 - Other Kidney and Urinary Diagnoses, Age Greater than 17 without CC           | 0.04  |        |     |
|                                    |                       | 326 - Kidney and Urinary Tract Signs and Symptoms, Age Greater than 17 without CC  | 0.01  |        |     |
|                                    | Drugs                 | Antibiotics: cefepime, ciprofloxacin, levofloxacin                                 |       | 2,556  | 30% |

\* More than one treatment is administered, DRG=Diagnosis Related Group, CC=complications, NEC=not elsewhere classifiable

Supplementary Table 3 – Costs references related to the healthcare resource consumption

| Visits/exams                       | Official tariff/cost |
|------------------------------------|----------------------|
| Specialist visit                   | €20.66               |
| Abdomen ultrasound                 | €32.02               |
| Bact smear-lower gastro-intestinal | €2.53                |
| Bladder ultrasound                 | €32.02               |
| Blood culture                      | €26.44               |
| Bowel diagnostic procedure NEC     | €51.65               |
| Colonoscopy                        | €86.80               |
| Complete blood count               | €3.17                |
| Computerised tomography scan       | €126.90              |
| Creatinine                         | €1.13                |
| Creatinine/glycaemia               | €1.17                |
| Cystography                        | €48.29               |
| Cystoscopy                         | €79.52               |
| Erythrocyte sedimentation rate     | €1.95                |
| Intestinal x-ray NEC               | €51.65               |
| Kidney functionality               | €18.84               |
| Lactate                            | €4.84                |
| Magnetic resonance imaging         | €120.08              |
| Pelvic floor examination           | €90.00               |
| Percutaneous cystostomy            | €32.76               |

|                                                                                   |            |
|-----------------------------------------------------------------------------------|------------|
| Polymerase Chain Reaction                                                         | €3.87      |
| Renal scintigraphy                                                                | €56.81     |
| Stool culture                                                                     | €12.01     |
| Urethroscopy                                                                      | €38.22     |
| Urine culture                                                                     | €8.31      |
| Urine exam                                                                        | €2.17      |
| Urodynamics                                                                       | €56.81     |
| Video-urodynamics                                                                 | €104.07    |
| <b>DRGs</b>                                                                       |            |
| 309 - Minor Bladder Procedures without CC                                         | €3,397.00  |
| 313 - Urethral Procedures, Age Greater than 17 without CC                         | €3,059.00  |
| 320 - Kidney and Urinary Tract Infections, Age Greater than 17 with CC            | €2,701.00  |
| 321 - Kidney and Urinary Tract Infections, Age Greater than 17 without CC         | €1,883.00  |
| 323 - Urinary Stones with CC and/or ESW Lithotripsy                               | €1,372.00  |
| 324 - Urinary Stones without CC                                                   | €935.00    |
| 325 - Kidney and Urinary Tract Signs and Symptoms, Age Greater than 17 with CC    | €1,878.00  |
| 326 - Kidney and Urinary Tract Signs and Symptoms, Age Greater than 17 without CC | €1,075.00  |
| 329 - Urethral Stricture, Age Greater than 17 without CC                          | €781.00    |
| 332 - Other Kidney and Urinary Diagnoses, Age Greater than 17 without CC          | €1,008.00  |
| 575 - Septicaemia with mechanical ventilation >=96 h                              | €21,349.00 |
| 576 - Septicaemia without mechanical ventilation                                  | €5,493.00  |
| <b>Day-hospitals</b>                                                              |            |

|                                                                                                                                                                                                                            |         |
|----------------------------------------------------------------------------------------------------------------------------------------------------------------------------------------------------------------------------|---------|
| 320 - Kidney and Urinary Tract Infections, Age Greater than 17 with CC                                                                                                                                                     | €216.00 |
| 576 - Septicaemia without mechanical ventilation                                                                                                                                                                           | €247.00 |
| <b>Drugs</b>                                                                                                                                                                                                               |         |
| Botulinum toxin injection                                                                                                                                                                                                  | €658.00 |
| Antimuscarins (mean cost per mg)                                                                                                                                                                                           | €0.032  |
| Antibiotics (prophylaxis): sulfamethoxazole+trimethoprim, amoxicillin, levofloxacin, ciprofloxacin (mean cost per mg)                                                                                                      | €0.003  |
| Antibiotics mix - Symptomatic UTI: amikacin, amoxicillin, ampicillin, cefixime, cefpodoxim, ceftriaxone, ciprofloxacin, imipenem, levofloxacin, meropenem, prulifloxacin, sulfamethoxazole+trimethoprim (mean cost per mg) | €0.002  |
| Antibiotics mix - First-line-resistant UTI: amikacin, ceftazidime, ceftriaxone, gentamicin, imipenem, meropenem, minocycline, piperacillin, thienamycin (mean cost per mg)                                                 | €0.008  |
| Antibiotics mix - Multidrug-resistant UTI: amikacin, imipenem, meropenem, piperacillin (mean cost per mg)                                                                                                                  | €0.05   |
| Antibiotics mix - Bacteraemia: cefepime, ceftazidime, imipenem, levofloxacin, meropenem, teicoplanin (mean cost per mg)                                                                                                    | €0.04   |
| Antibiotics mix - Infection leading to patient death: amikacin, imipenem, meropenem, vancomycin (mean cost per mg)                                                                                                         | €0.04   |
| Antibiotics mix - Haematuria: cefepime, ciprofloxacin, levofloxacin (mean cost per mg)                                                                                                                                     | €0.01   |

DRG=Diagnosis Related Group, CC=complications, NEC=not elsewhere classifiable



Supplementary Table 4 – Model parameters and distributions used in PSA (unless otherwise specified, variation ranges refer to +/- 50% of the baseline value)

| Parameter                                                | Base case value | Variation range | Distribution type | Alpha   | Beta   |
|----------------------------------------------------------|-----------------|-----------------|-------------------|---------|--------|
| <b>Utility coefficients for the health states/events</b> |                 |                 |                   |         |        |
| Alive                                                    | 0.831           | 0.809 - 0.852 § | beta              | 969.1   | 197.1  |
| Symptomatic UTI (4 days)                                 | 0.782           | 0.764 - 0.799 § | beta              | 1671.49 | 465.96 |
| First-line-resistant UTI (8 days)                        | 0.76            | 0.685 - 0.834 § | beta              | 95.2    | 30.1   |
| Multidrug-resistant UTI (8 days)                         | 0.738           | 0.688 - 0.787 § | beta              | 222.99  | 79.16  |
| Bacteraemia (37 days or 65 if leading to death)          | 0.716           | 0.645 - 0.786 § | beta              | 111.82  | 44.35  |
| Haematuria (2 days)                                      | 0.738           | 0.688 - 0.787 § | beta              | 223.0   | 79.2   |
| <b>Annual transition probabilities</b>                   |                 |                 |                   |         |        |
| Symptomatic UTI → First-line-resistant UTI               | 0.083           | 0.0 - 23.2 §    | beta              | 1.75    | 19.36  |
| Symptomatic UTI → Multidrug-resistant UTI                | 0.07            | 5.1 - 9.2 §     | beta              | 41.6    | 552.5  |
| Symptomatic UTI → Bacteraemia                            | 0.036           | 3.4 - 3.8 §     | beta              | 1200    | 32129  |
| Multidrug-resistant UTI → Death                          | 0.026           | 1.3 - 5.1 §     | beta              | 3.1     | 37.0   |
| Bacteraemia → Death                                      | 0.077           | 2.9 - 19.2 §    | beta              | 7.09    | 263.42 |
| <b>Mean number of events per patient per year</b>        |                 |                 |                   |         |        |
| Symptomatic UTI                                          | 1.68            | 0.84 - 2.52     | gamma             | 100.0   | 0.077  |
| Haematuria                                               | 0.29            | 0.14 – 0.49     | gamma             | 38      | 0.009  |
| <b>Rate ratios</b>                                       |                 |                 |                   |         |        |
| Symptomatic UTI (uncoated vs. hydrophilic)               | 0.47            | 0.47 – 0.92     | lognormal         | 0.024*  |        |
| Haematuria (uncoated vs. hydrophilic)                    | 1.35            | 0.68 – 2.03     | lognormal         | 0.261*  |        |
| <b>Costs</b>                                             |                 |                 |                   |         |        |
| Alive (annual cost)                                      | 954.48€         | 477€ - 1432€    | gamma             | 100.0   | 9.5    |
| Symptomatic UTI                                          | 1,091.86€       | 546€ – 1,638€   | gamma             | 100.0   | 10.9   |
| First-line-resistant UTI                                 | 401.20€         | 201€ - 602€     | gamma             | 100.0   | 4.0    |
| Multidrug-resistant UTI                                  | 775.36€         | 388€ – 1,163€   | gamma             | 100.0   | 7.8    |
| Bacteraemia                                              | 3,664.16€       | 1,832€ – 5,496€ | gamma             | 100.0   | 36.6   |
| Haematuria                                               | 106.10€         | 53€ - 159€      | gamma             | 100.0   | 1.1    |

|                                   |           |                  |       |       |      |
|-----------------------------------|-----------|------------------|-------|-------|------|
| Death for bacteraemia             | 6,057.70€ | 3,029€ – 9,087€  | gamma | 100.0 | 60.6 |
| Death for Multidrug-resistant UTI | 9,721.86€ | 4,861€ – 14,583€ | gamma | 100.0 | 97.2 |

\* standard error, § values reported are 95%CI

Supplementary Table 5 – One-way sensitivity analyses

| Variable                                               | Value |           |         | ICUR (€/QALY) |           |         |
|--------------------------------------------------------|-------|-----------|---------|---------------|-----------|---------|
|                                                        | Low   | Base case | High    | Low           | Base case | High    |
| Start age                                              | 20    | 40        | 60      | 19,942        | 24,405    | 35,525  |
| Proportion men                                         | 40%   | 80%       | 100%    | 25,014        | 24,405    | 23,789  |
| Mean number per patient per year, Symptomatic UTI      | 0.84  | 1.68      | 2.52    | 67,340        | 24,405    | 10,411  |
| Mean number per patient per year, Haematuria           | 0.15  | 0.29      | 0.44    | 24,254        | 24,405    | 24,557  |
| Annual probability, First line resistant UTI           | 0.042 | 0.084     | 0.126   | 24,727        | 24,405    | 24,084  |
| Annual probability, Multidrug-resistant UTI            | 0.035 | 0.070     | 0.105   | 29,797        | 24,405    | 20,797  |
| Annual probability, Bacteraemia                        | 0.018 | 0.036     | 0.054   | 34,298        | 24,405    | 19,073  |
| Annual probability, Bacteraemia to Death               | 0.039 | 0.077     | 0.116   | 32,395        | 24,405    | 20,049  |
| Annual probability, Multidrug-resistant UTI to Death   | 0.013 | 0.026     | 0.039   | 29,122        | 24,405    | 21,228  |
| Rate ratio, Symptomatic UTI (uncoated vs. hydrophilic) | 0.47  | 0.47      | 0.92    | 24,405        | 24,405    | 282,622 |
| Rate ratio, Haematuria (uncoated vs. hydrophilic)      | 0.68  | 1.35      | 2.03    | 23,900        | 24,405    | 24,912  |
| Standardised mortality ratio, men                      | 0.90  | 1.80      | 2.70    | 23,355        | 24,405    | 25,294  |
| Standardised mortality ratio, women                    | 2.45  | 4.90      | 7.35    | 23,714        | 24,405    | 25,023  |
| Annual cost, "Alive" health state                      | € 477 | € 954     | € 1,432 | 23,844        | 24,405    | 24,966  |

|                                                                  |         |         |          |           |        |        |
|------------------------------------------------------------------|---------|---------|----------|-----------|--------|--------|
| Cost per Symptomatic UTI                                         | € 546   | € 1,092 | € 1,638  | 33,929    | 24,405 | 14,881 |
| Cost per First-line-resistant UTI                                | € 201   | € 401   | € 602    | 24,699    | 24,405 | 24,111 |
| Cost per Multidrug-resistant UTI                                 | € 388   | € 775   | € 1,163  | 24,879    | 24,405 | 23,932 |
| Cost per Bacteraemia                                             | € 1,832 | € 3,664 | € 5,496  | 25,556    | 24,405 | 23,255 |
| Cost per Haematuria                                              | € 53    | € 106   | € 159    | 24,270    | 24,405 | 24,541 |
| Cost per Death for bacteraemia                                   | € 3,029 | € 6,058 | € 9,087  | 24,554    | 24,405 | 24,257 |
| Cost per Death for multidrug-resistant UTI                       | € 4,861 | € 9,722 | € 14,583 | 24,563    | 24,405 | 24,248 |
| Unit cost, hydrophilic catheter                                  | € 0.85  | € 1.70  | € 2.55   | dominance | 24,405 | 51,402 |
| Unit cost, standard catheter                                     | € 0.13  | € 0.25  | € 0.38   | 28,147    | 24,405 | 20,663 |
| Number of catheters per day                                      | 2       | 4       | 6        | 1,151     | 24,405 | 47,660 |
| Duration of bacteraemia hospitalisation (days)                   | 19      | 37      | 56       | 24,456    | 24,405 | 24,355 |
| Duration of bacteraemia hospitalisation (days), leading to death | 33      | 65      | 98       | 24,413    | 24,405 | 24,398 |
| Duration of multidrug-resistant UTI-death hospitalisation (days) | 33      | 65      | 98       | 24,410    | 24,405 | 24,400 |
| Utility, Alive                                                   | 0.416   | 0.831   | 1        | 65,598    | 24,405 | 19,440 |
| Utility, Symptomatic UTI                                         | 0.391   | 0.782   | 1        | 22,709    | 24,405 | 25,466 |
| Utility, First-line-resistant UTI                                | 0.380   | 0.760   | 1        | 23,871    | 24,405 | 24,755 |
| Utility, Multidrug-resistant UTI                                 | 0.375   | 0.749   | 1        | 23,926    | 24,405 | 24,737 |
| Utility, Bacteraemia                                             | 0.358   | 0.716   | 1        | 23,782    | 24,405 | 24,923 |
| Utility, Haematuria                                              | 0.369   | 0.738   | 1        | 24,532    | 24,405 | 24,316 |
| Duration, Symptomatic UTI (days)                                 | 2       | 4       | 6        | 24,520    | 24,405 | 24,292 |

|                                                                    |    |      |    |        |        |        |
|--------------------------------------------------------------------|----|------|----|--------|--------|--------|
| Duration, First-line-resistant UTI (days)                          | 4  | 8    | 12 | 24,433 | 24,405 | 24,377 |
| Duration, Multidrug-resistant UTI (days)                           | 8  | 16   | 24 | 24,459 | 24,405 | 24,352 |
| Duration, Bacteraemia (days)                                       | 19 | 37   | 56 | 24,488 | 24,405 | 24,323 |
| Duration, Haematuria (days)                                        | 1  | 2    | 3  | 24,389 | 24,405 | 24,421 |
| Duration, Bacteraemia, if leading to death (days)                  | 33 | 65   | 98 | 24,417 | 24,405 | 24,393 |
| Duration, pre-death multidrug-resistant UTI hospitalisation (days) | 33 | 65   | 98 | 24,413 | 24,405 | 24,397 |
| Discount rate, Costs                                               | 0  | 3.5% | 5% | 43,046 | 24,405 | 20,081 |
| Discount rate, QALYs                                               | 0  | 3.5% | 5% | 11,255 | 24,405 | 32,433 |

\* Catheters cost not included
